# Supplementary material for: Timescales of emergence of chronic flooding in the major economic center of Guadeloupe
Source: Copernicus journal article supplement (doi:10.5194/nhess-21-703-2021), 2021-02-22
Supplement: Supplementary file 1 [file nhess-21-703-2021-supplement.zip]

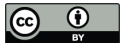

## *Supplement of*

# **Timescales of emergence of chronic flooding in the major economic center of Guadeloupe**

**Gonéri Le Cozannet et al.**

*Correspondence to:* Gonéri Le Cozannet ([g.lecozannet@brgm.fr](mailto:g.lecozannet@brgm.fr))

- [nhess-21-703-2021-supplement-title-page.pdf](#)
- [Chronic\\_Flood\\_supp\\_mat.R](#)
- [Readme.txt](#)
- [Sea.Level.Guadeloupe.reconstruction.txt](#)
- [histo.mat](#)
- [slr\\_guadeloupe\\_RCP85\\_AR5\\_noMIROC.txt](#)
- [slr\\_guadeloupe\\_RCP85\\_SROCC\\_noMIROC.txt](#)
- [slr\\_guadeloupe\\_RCP85\\_highend\\_noMIROC.txt](#)

The copyright of individual parts of the supplement might differ from the CC BY 4.0 License.
